# Supplementary material
Source: PubMed Central journal article supplement (PMC3365776)
Supplement: supp_M111.326538_jbc.M111.326538-1.pdf [file supp_M111.326538_jbc.M111.326538-1.pdf]

# Supplemental Figure 1

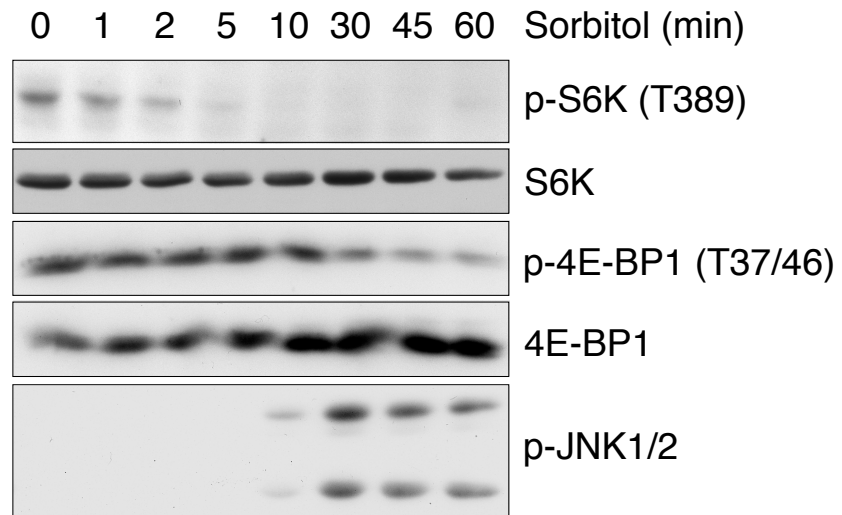

**Supplemental Figure 1. The time course of the effect of sorbitol treatment on the phosphorylation of S6K, 4E-BP1 and JNK** Lysates from Fig. 1B were subjected to immunoblotting with the indicated antibodies.

# Supplemental Figure 2

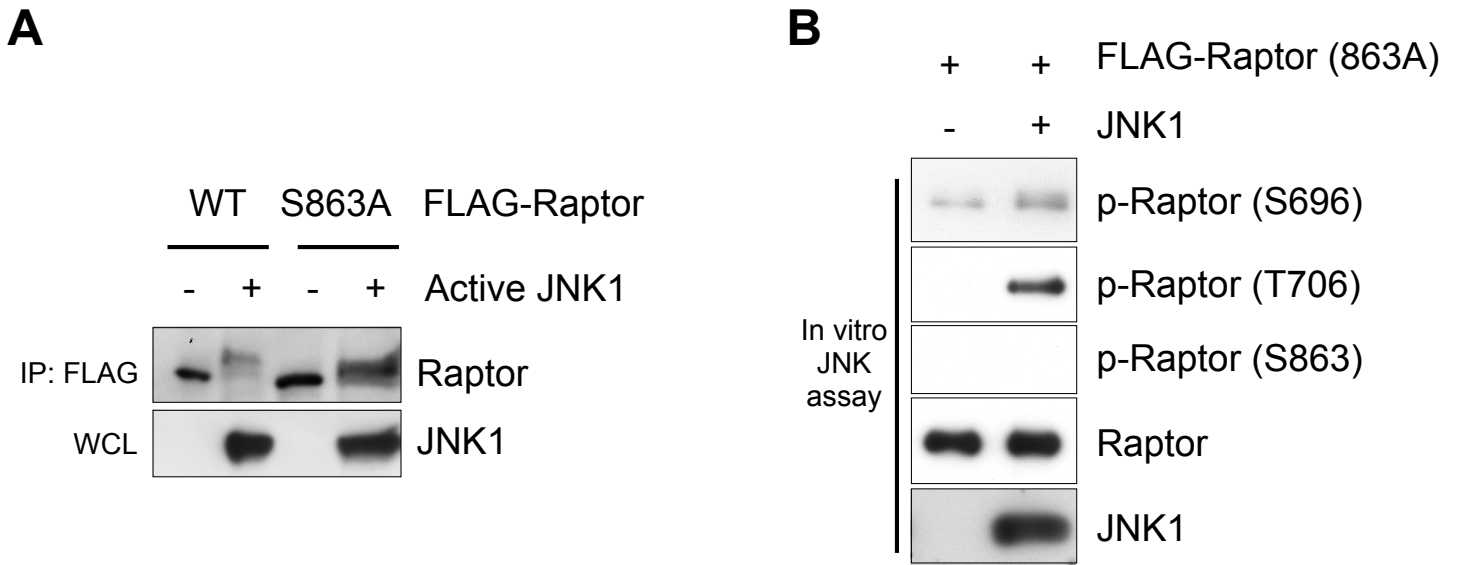

**Supplemental Figure 2. JNK phosphorylates Raptor at S696 and T706 as well as S863.** *A*, HEK293 cells transfected FLAG-Raptor WT or S863A mutant and FLAG-cmv2 vector or FLAG-MKK7-JNK1 (active JNK1) and serum-starved overnight. The FLAG-Raptor proteins were immunoprecipitated and immunoblotted with the indicated antibodies *B*, Immunoprecipitated FLAG-Raptor S863A mutant was incubated with purified activated JNK1 in a kinase reaction and then subjected to SDS-PAGE and immunoblotting with phospho-Raptor antibodies.
